# Supplementary material for: Naturally-occurring tooth wear, tooth fracture, and cranial injuries in large carnivores from Zambia
Source: PeerJ journal article supplement (doi:10.7717/peerj.11313), 2021-04-20
Supplement: Fig_S1_R2.pdf [file Fig_S1_R2.pdf]

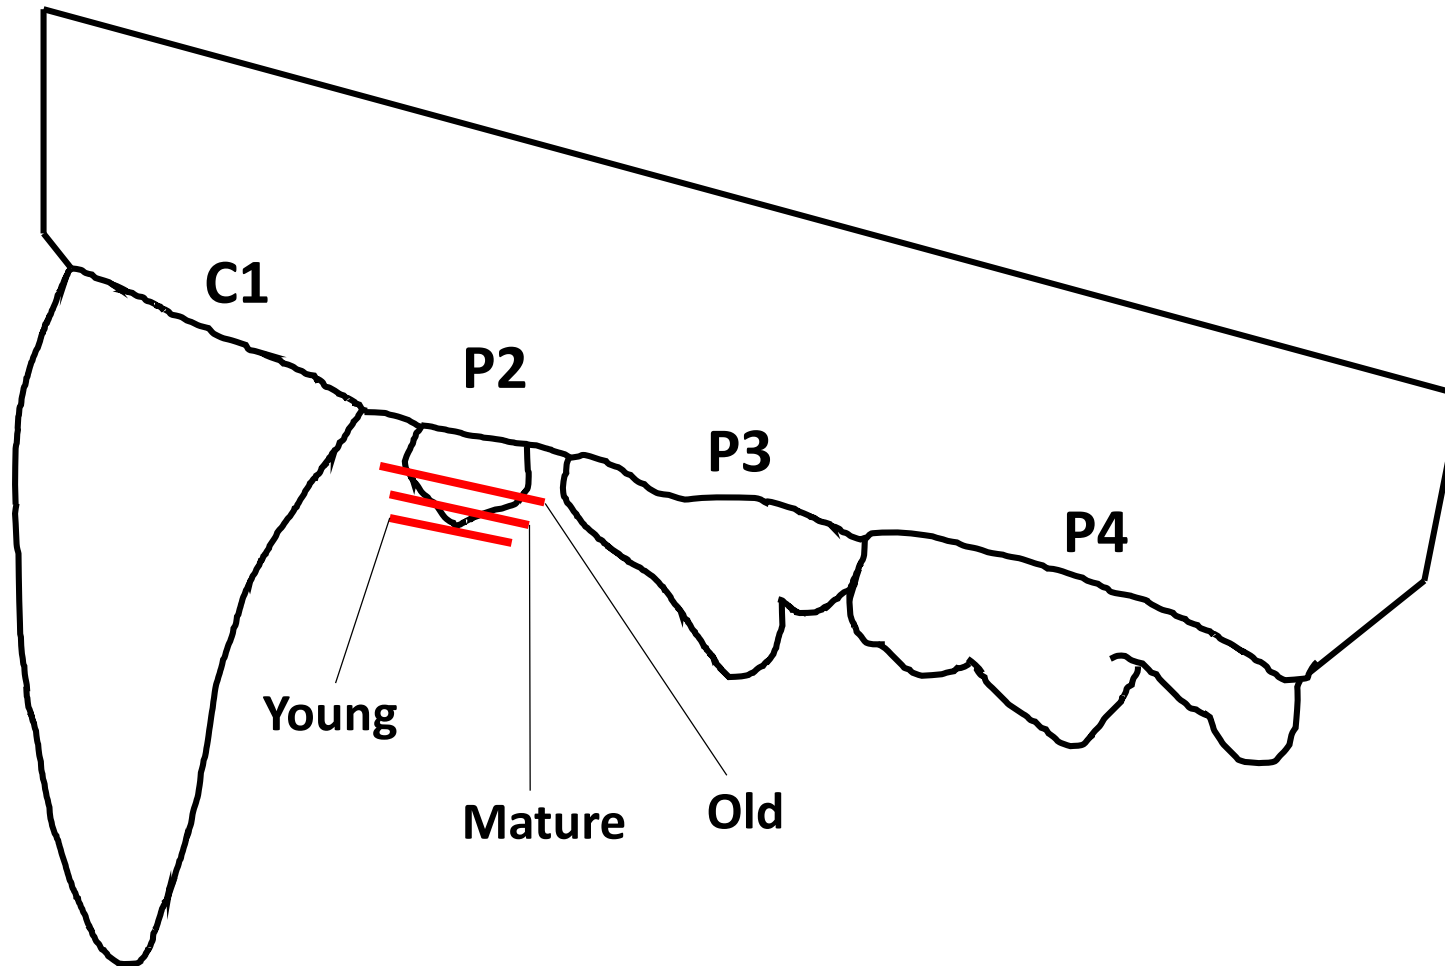

Age classes for Lion based on gradual rounding and flattening of the P2 as a result of normal wear (adapted from White and Belant 2016). Young: no wear/sharp; Mature: moderate wear/rounded; Old: heavy wear/flat,
