# Supplementary material for: Naturally-occurring tooth wear, tooth fracture, and cranial injuries in large carnivores from Zambia
Source: PeerJ journal article supplement (doi:10.7717/peerj.11313), 2021-04-20
Supplement: Fig_S3_R2.pdf [file Fig_S3_R2.pdf]

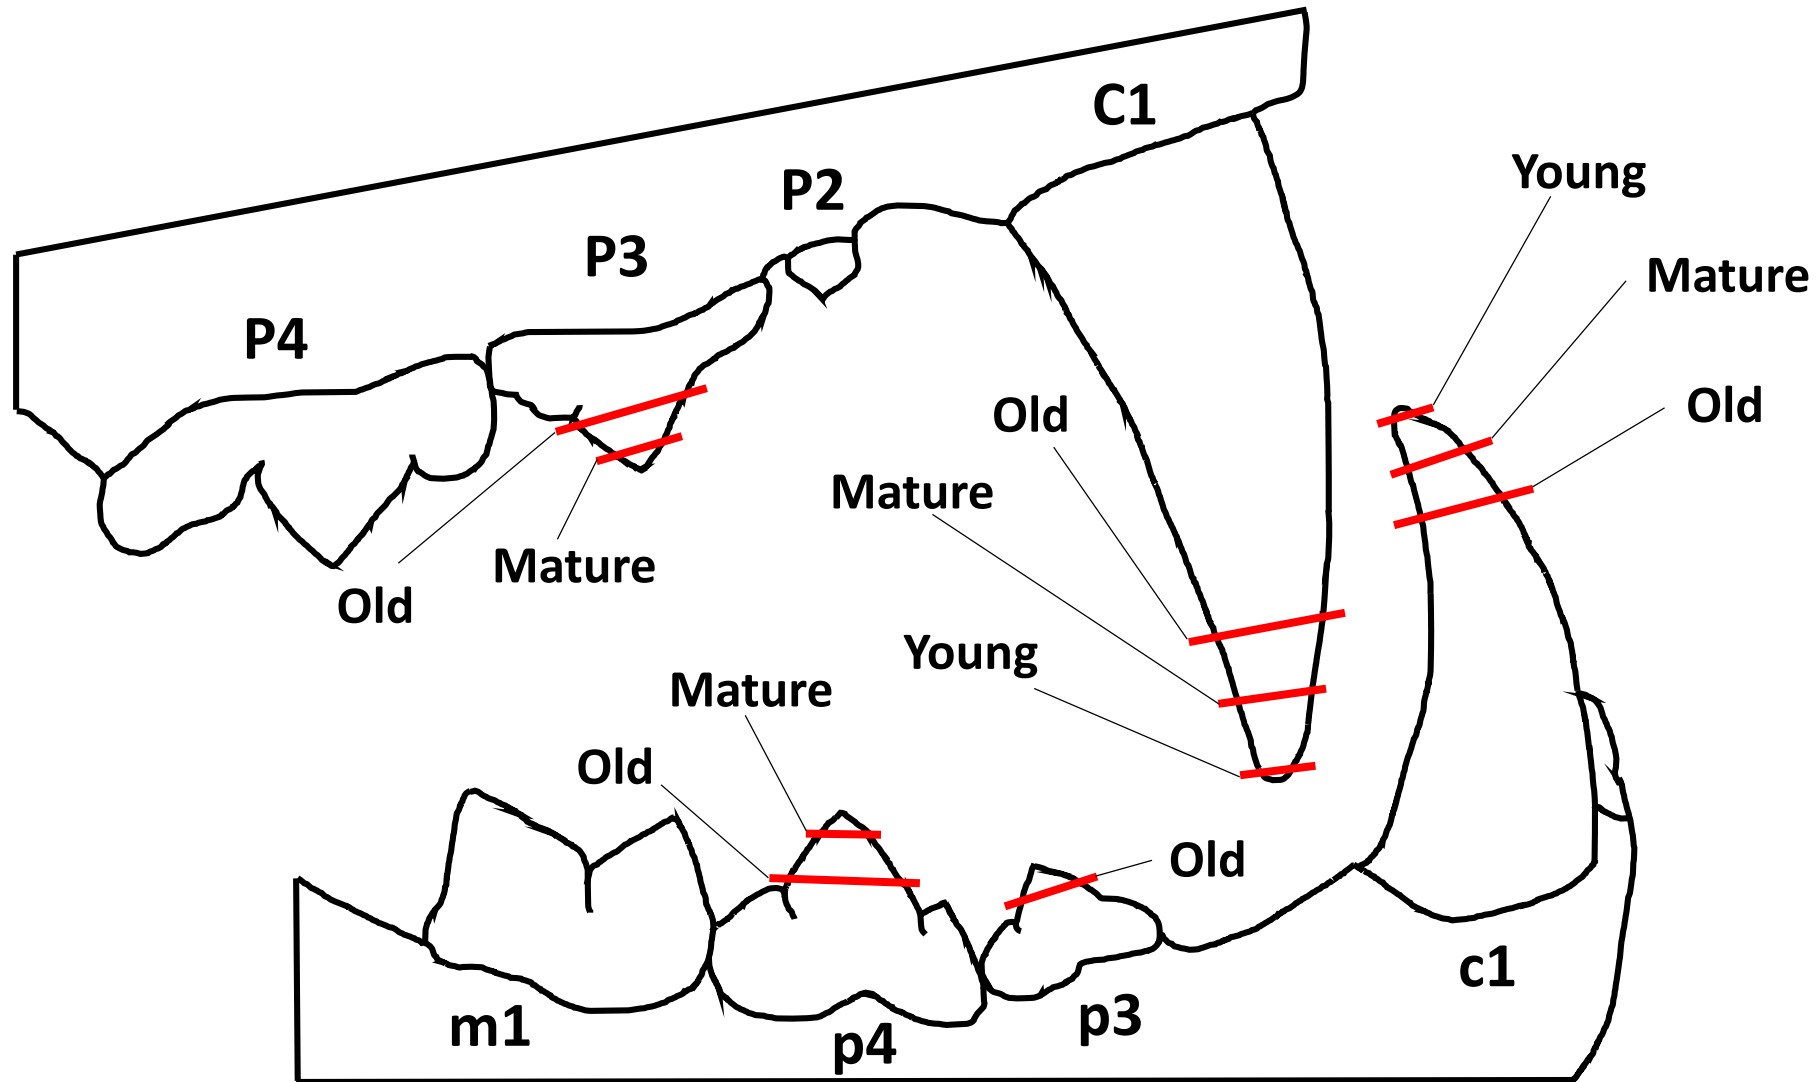

Age classes for Leopard based on gradual rounding and flattening of the C1, c1, P3, p3,4 as a result of normal wear (adapted from Stander 1997). Young adult  $\leq 4$  years; Mature adult 5-6 years; Old adult 7-10 years.
