# Supplementary material for: Naturally-occurring tooth wear, tooth fracture, and cranial injuries in large carnivores from Zambia
Source: PeerJ journal article supplement (doi:10.7717/peerj.11313), 2021-04-20
Supplement: Fig_S4_R2.pdf [file Fig_S4_R2.pdf]

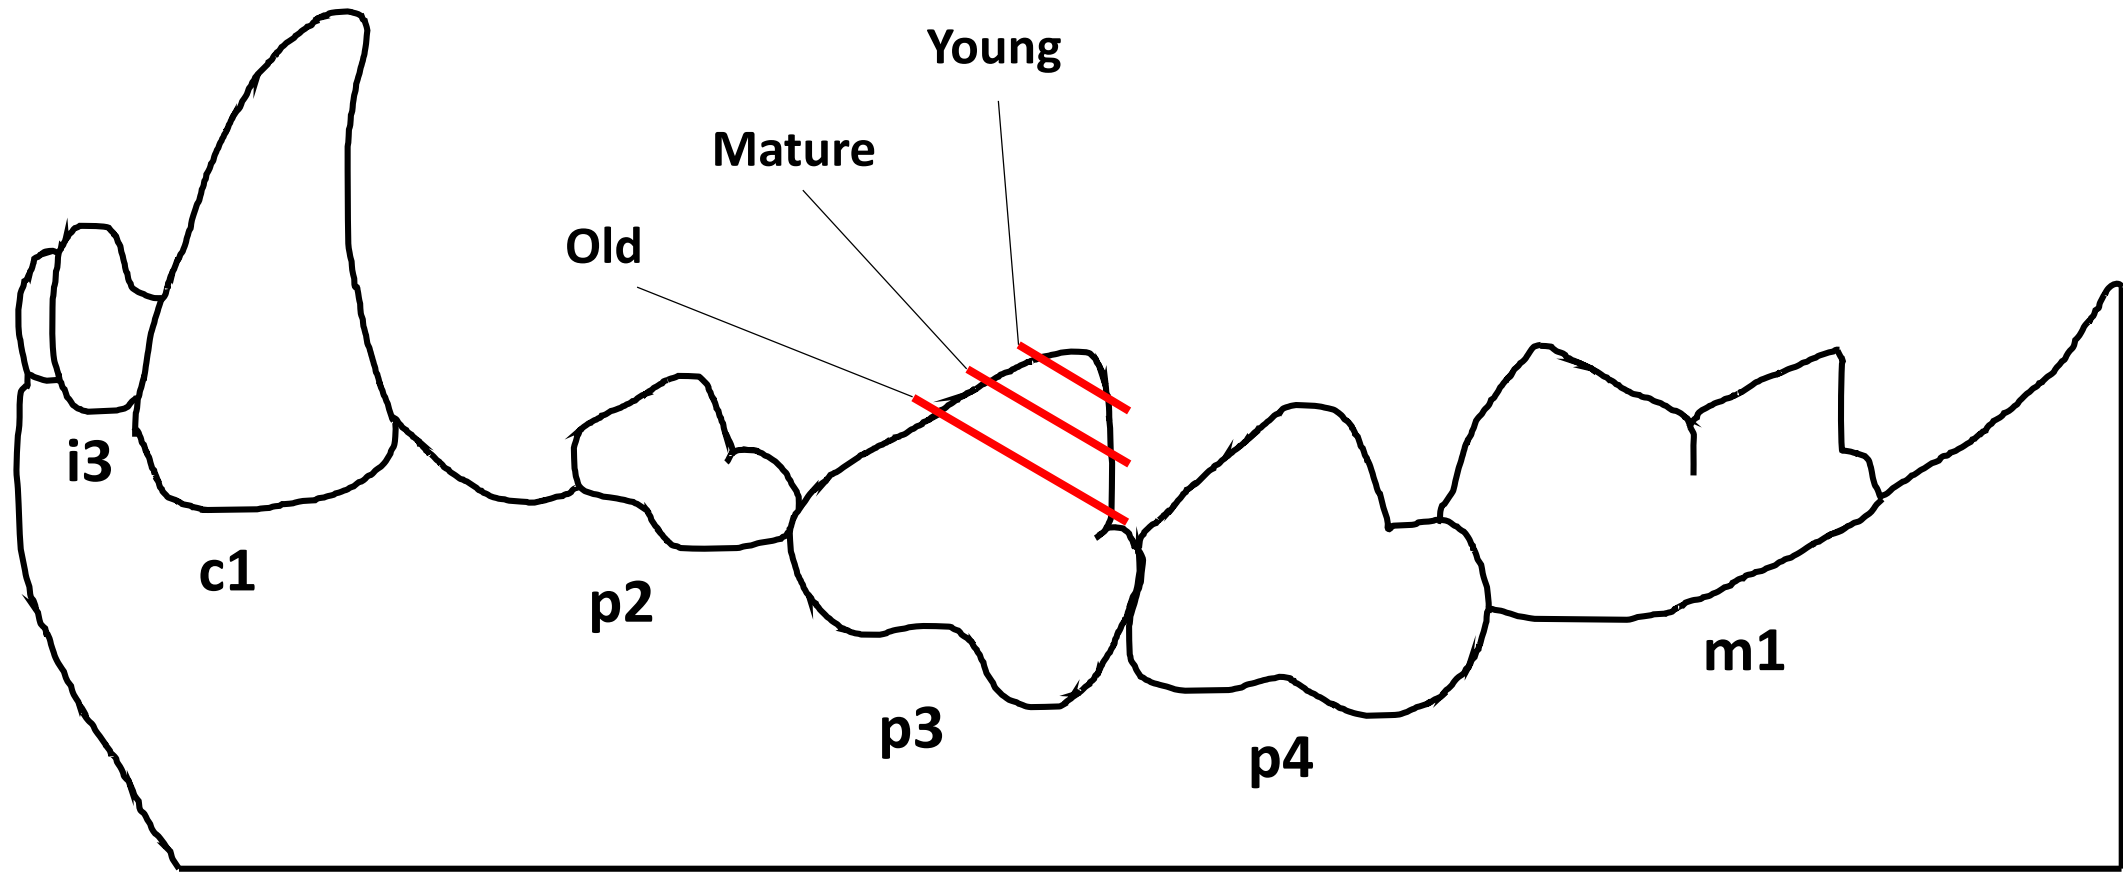

Age classes for Spotted Hyena based on gradual flattening of the occlusal surface of the p3 as a result of normal wear (adapted from Kruuk 1972).  
Young 1-3 years; Mature >3-6 years; Old >6-16 years.
