# Supplementary material for: Naturally-occurring tooth wear, tooth fracture, and cranial injuries in large carnivores from Zambia
Source: PeerJ. 2021 Apr 20;9:e11313. doi: 10.7717/peerj.11313 (PMC8063872; doi:10.7717/peerj.11313)
Supplement: Supplemental Information 8 [file peerj-09-11313-s008.xlsx]

## Sheet: P. leo Age Estimation
SAMPLE ID #	REGION	P2 SCORE	YEAR AGE ESTIMATE BASED ON OVERALL TOOTH WEAR	INTERFRONTAL SUTURE Unfused / Visible / Obliterated	AGE CLASS
Z01	Luangwa Valley	2	5-6	Visi / Oblit	Mature
Z02	Kafue	2	5-6	Obliterated	Mature
Z03	Kafue	1	5	Visi / Oblit	Mature
Z04	Luangwa Valley	3	5-6	Visi / Oblit	Mature
Z05	Kafue	2	5-6	Visi / Oblit	Mature
Z06	Luangwa Valley	3	6-7	Visi / Oblit	Mature
Z07	Luangwa Valley	2	5-6	Visi / Oblit	Mature
Z08	Kafue	2	6-7	Obliterated	Mature
Z09	Luangwa Valley	2	5-6-7	Visi / Oblit	Mature
Z10	Kafue	2	5	Unfused / Visi / Oblit	Mature
Z11	Luangwa Valley	2	5-6-7	Visi / Oblit	Mature
Z12	Kafue	2	5	Unfused / Visi / Oblit	Mature
Z13	Kafue	N/A	5-6	Visi / Oblit	Mature
Z14	Kafue	2	5-6	Unfused / Visi / Oblit	Mature
Z15	Kafue	2	5-6	N/A	Mature
Z16	Luangwa Valley	2	5	Unfused / Visi / Oblit	Mature
Z17	Kafue	2	5	Unfused / Visi / Oblit	Mature
Z18	Luangwa Valley	2	5-6-7	Visi / Oblit	Mature
Z19	Luangwa Valley	2	5	Unfused / Visi / Oblit	Mature
Z20	Kafue	2	5-6-7	Visi / Oblit	Mature
Z21	Kafue	2	7-9	N/A	Old
Z22	Kafue	2	5-6	N/A	Mature
Z23	Kafue	2	5-6	N/A	Mature
Z24	Kafue	2	5-6	Visi / Oblit	Mature
Z25	Luangwa Valley	2	6-7	Visi / Oblit	Mature
Z26	Luangwa Valley	2	6-7	Obliterated	Mature
Z27	Kafue	2	5-6	Visi / Oblit	Mature
Z28	Kafue	1	5-6-7	Visi / Oblit	Mature
Z29	Luangwa Valley	2	6-7	Visi / Oblit	Mature
Z30	Luangwa Valley	2	5-6-7	Visi / Oblit	Mature
Z31	Luangwa Valley	2	5-6	Visi / Oblit	Mature
Z32	Luangwa Valley	2	6-7	Visi / Oblit	Mature
Z33	Luangwa Valley	2	5-6	Visi / Oblit	Mature
Z34	Kafue	2	5-6	Visi / Oblit	Mature
Z35	Luangwa Valley	2	5-6	Visi / Oblit	Mature
Z36	Luangwa Valley	2	5-6	Visi / Oblit	Mature
Z37	Kafue	2	5-6	Unfused / Visi / Oblit	Mature
Z38	Kafue	N/A	5-6	N/A	Mature
Z39	Luangwa Valley	3	6-7	N/A	Mature
Z40	Kafue	2	7-9	Obliterated	Old
Z41	Kafue	2	4-5	Unfused / Visi	Young
Z42	Luangwa Valley	2	5-6	Visi / Oblit	Mature
Z43	Kafue	2	5-6	Visi / Oblit	Mature
Z44	Kafue	2	5-6	N/A	Mature
Z45	Kafue	2	5-6	Visi / Oblit	Mature
Z46	Luangwa Valley	2	5-6	Visi / Oblit	Mature
Z47	Luangwa Valley	2	6-7	Visi / Oblit	Mature
Z48	Kafue	2	5-6	Visi / Oblit	Mature
Z49	Luangwa Valley	2	6-7	Visi / Oblit	Mature
Z50	Kafue	3	5-6-7	Visi / Oblit	Mature
Z51	Luangwa Valley	1	4	Unfused	Young
Z52	Luangwa Valley	3	6-7	Visi / Oblit	Mature
Z53	Kafue	1	3-4	Unfused	Young
Z54	Kafue	2	7-9	Obliterated	Old
Z55	Kafue	N/A	5-6	N/A	Mature
Z56	Kafue	2	5-6	Visi / Oblit	Mature
Z57	Kafue	N/A	5-6	Visi / Oblit	Mature
Z58	Kafue	N/A	5-6-7	Visi / Oblit	Mature
Z59	Luangwa Valley	2	5-6	Visi / Oblit	Mature
Z60	Kafue	2	5-6	Visi / Oblit	Mature
Z61	Luangwa Valley	2	5-6	Visi / Oblit	Mature
Z62	Luangwa Valley	3	10+	Obliterated	Old
Z63	Kafue	3	7-9	N/A	Old
Z64	Luangwa Valley	2	5-6	Visi / Oblit	Mature
Z65	Luangwa Valley	N/A	6-7	Visi / Oblit	Mature
Z66	Luangwa Valley	2	5-6	Visi / Oblit	Mature
Z67	Luangwa Valley	2	5-6-7	Visi / Oblit	Mature
Z68	Luangwa Valley	N/A	7-9	Visi / Oblit	Old
Z69	Kafue	2	5-6	Visi / Oblit	Mature
Z70	Luangwa Valley	2	6-7	Visi / Oblit	Mature
Z71	Luangwa Valley	2	5-6	Visi / Oblit	Mature
Z72	Luangwa Valley		5-6-7	Visi / Oblit	Mature
Z73	Kafue	2	5-6	Visi / Oblit	Mature
Z74	Luangwa Valley	2	5-6	Visi / Oblit	Mature
Z75	Kafue	N/A	5-6	Visi / Oblit	Mature
Z76	Kafue	1	2-3	Unfused	Young
Z77	Kafue	2	2-3	Unfused	Young
Z78	Luangwa Valley	2	7-9	Obliterated	Old
Z79	Kafue	N/A	3-4	Unfused / Visi	Young
Z80	Kafue	2	5	Unfused / Visi / Oblit	Mature
Z81	Luangwa Valley	3	6-7	Obliterated	Mature
Z82	Luangwa Valley	N/A	7-9	Obliterated	Old
Z83	Kafue	2	5-6	Visi / Oblit	Mature
Z84	Luangwa Valley	2	5-6	Visi / Oblit	Mature
Z85	Luangwa Valley	2	5-6	N/A	Mature
Z86	Kafue	1	6-7	Visi / Oblit	Mature
Z87	Kafue	2	5-6	Visi / Oblit	Mature
Z88	Kafue	N/A	5-6	Visi / Oblit	Mature
Z89	Kafue	2	5	Unfused / Visi / Oblit	Mature
Z90	Luangwa Valley	2	6-7	Obliterated	Mature
Z91	Luangwa Valley	2	7-9	Obliterated	Old
Z92	Luangwa Valley	2	5-6	Unfused / Visi / Oblit	Mature
Z93	Luangwa Valley	2	5-6	Visi / Oblit	Mature
Z94	Luangwa Valley	2	5-6	Visi / Oblit	Mature
Z95	Kafue	2	4-5	Unfused / Visi	Young
Z96	Luangwa Valley	1	4	Unfused / Visi	Young
Z97	Kafue	N/A	5-6	Visi / Oblit	Mature
Z98	Kafue	3	7-9	Visi / Oblit	Old
Z99	Luangwa Valley	2	5-6	N/A	Mature
Z100	Kafue	2	5-6	Visi / Oblit	Mature
Z101	Kafue	2	5	Unfused / Visi / Oblit	Mature
Z102	Luangwa Valley	2	5-6-7	Visi / Oblit	Mature
Z103	Luangwa Valley	1	4	Unfused / Visi	Young
Z104	Kafue	2	6-7	Visi / Oblit	Mature
Z105	Luangwa Valley	N/A	6-7	Visi / Oblit	Mature
Z106	Kafue	N/A	5	Unfused / Visi / Oblit	Mature
Z107	Luangwa Valley	N/A	5	Unfused / Visi / Oblit	Mature
Z108	Luangwa Valley	2	6-7	Visi / Oblit	Mature
Z109	Luangwa Valley	2	5-6	Unfused / Visi / Oblit	Mature
Z110	Luangwa Valley	2	5-6	Visi / Oblit	Mature
Z111	Luangwa Valley	2	5-6	Visi / Oblit	Mature
Z112	Luangwa Valley	2	7-9	Visi / Oblit	Old
Z113	Kafue	2	5-6	N/A	Mature
Z114	Kafue	2	6-7	Obliterated	Mature
Z115	Kafue	2	5	Visi / Oblit	Mature
Z116	Kafue	N/A	5-6-7	N/A	Mature
Z117	Luangwa Valley	2	7-9	Visi / Oblit	Old
Z118	Luangwa Valley	2	7-9	Obliterated	Old

## Sheet: P. pardus Age Estimation
SAMPLE ID #	REGION	YEAR AGE ESTIMATE BASED ON CANINES & PREMOLARS (Stander 1997)	AGE CLASS
Z200	Kafue	2-3	Young
Z201	Kafue	5-6	Mature
Z202	Kafue	5-6	Mature
Z203	Luangwa Valley	7-10	Old
Z204	Luangwa Valley	5	Mature
Z205	Kafue	5	Mature
Z206	Kafue	5-6	Mature
Z207	Luangwa Valley	7-10	Old
Z208	Luangwa Valley	5	Mature
Z209	Kafue	5-6	Mature
Z210	Kafue	5	Mature
Z211	Kafue	2-3	Young
Z212	Luangwa Valley	5-6	Mature
Z213	Luangwa Valley	5-6	Mature
Z214	Kafue	5-6	Mature
Z215	Luangwa Valley	5-6	Mature
Z216	Kafue	5-6	Mature
Z217	Kafue	5-6	Mature
Z218	Luangwa Valley	7-10	Old
Z219	Luangwa Valley	5-6	Mature
Z220	Luangwa Valley	7-10	Old
Z221	Kafue	5-6	Mature
Z222	Kafue	5-6	Mature
Z223	Kafue	5-6	Mature
Z224	Kafue	5	Mature
Z225	Luangwa Valley	5-6	Mature
Z226	Luangwa Valley	5-6	Mature
Z227	Luangwa Valley	1-2	Young
Z228	Kafue	5-6	Mature
Z229	Kafue	5-6	Mature
Z230	Kafue	5-6	Mature
Z231	Luangwa Valley	1-2	Young
Z232	Kafue	5	Mature
Z233	Kafue	7-10	Old
Z234	Luangwa Valley	5-6	Mature
Z235	Kafue	7-10	Old
Z236	Kafue	5	Mature
Z237	Kafue	5	Mature
Z238	Luangwa Valley	2-3	Young
Z239	Luangwa Valley	5	Mature
Z240	Kafue	2-3	Young
Z241	Kafue	5-6	Mature
Z242	Kafue	5-6	Mature
Z243	Luangwa Valley	5-6	Mature
Z244	Kafue	5	Mature

## Sheet: C. crocuta Age Estimation
SAMPLE ID #	REGION	YEAR AGE ESTIMATE BASED ON p3 WEAR (Kruuk 1972)	AGE CLASS
Z300	Kafue	6-16	Old
Z301	Luangwa Valley	6-16	Old
Z302	Luangwa Valley	1-3	Young
Z303	Luangwa Valley	6-16	Old
Z304	Kafue	1-3	Young
Z305	Luangwa Valley	3-6	Mature
Z306	Luangwa Valley	1-3	Young
Z307	Kafue	3-6	Mature
Z308	Kafue	3-6	Mature
Z309	Kafue	6-16	Old
Z310	Luangwa Valley	6-16	Old
Z311	Kafue	6-16	Old
Z312	Kafue	1-3	Young
