# Supplementary material for: Naturally-occurring tooth wear, tooth fracture, and cranial injuries in large carnivores from Zambia
Source: PeerJ. 2021 Apr 20;9:e11313. doi: 10.7717/peerj.11313 (PMC8063872; doi:10.7717/peerj.11313)
Supplement: Supplemental Information 10 [file peerj-09-11313-s010.xlsx]

## Sheet: P. leo Injury
SAMPLE ID #	REGION	BLUNT TRAUMA Y/N	IF BLUNT TRAUMA 'YES' then MAJOR Y/N	INTRASPECIFIC CONFLICT Y/N
Z02	Kafue	No		No
Z03	Kafue	No		No
Z08	Kafue	No		No
Z10	Kafue	No		No
Z106	Kafue	No		No
Z113	Kafue	No		No
Z114	Kafue	No		No
Z116	Kafue	No		No
Z12	Kafue	No		No
Z14	Kafue	No		No
Z20	Kafue	No		No
Z22	Kafue	No		No
Z23	Kafue	No		No
Z24	Kafue	No		No
Z34	Kafue	No		No
Z41	Kafue	No		No
Z45	Kafue	No		No
Z48	Kafue	No		No
Z53	Kafue	No		No
Z54	Kafue	No		No
Z77	Kafue	No		No
Z80	Kafue	No		No
Z86	Kafue	No		No
Z89	Kafue	No		No
Z97	Kafue	No		No
Z98	Kafue	No		No
Z05	Kafue	No		Yes
Z101	Kafue	No		Yes
Z104	Kafue	No		Yes
Z115	Kafue	No		Yes
Z37	Kafue	No		Yes
Z50	Kafue	No		Yes
Z56	Kafue	No		Yes
Z57	Kafue	No		Yes
Z58	Kafue	No		Yes
Z73	Kafue	No		Yes
Z75	Kafue	No		Yes
Z79	Kafue	No		Yes
Z95	Kafue	No		Yes
Z13	Kafue	Yes	Yes	No
Z17	Kafue	Yes	No	No
Z21	Kafue	Yes	No	No
Z28	Kafue	Yes	No	No
Z40	Kafue	Yes	Yes	No
Z43	Kafue	Yes	No	No
Z55	Kafue	Yes	Yes	No
Z60	Kafue	Yes	No	No
Z69	Kafue	Yes	No	No
Z76	Kafue	Yes	Yes	No
Z83	Kafue	Yes	No	No
Z87	Kafue	Yes	Yes	No
Z88	Kafue	Yes	No	No
Z100	Kafue	Yes	No	Yes
Z15	Kafue	Yes	No	Yes
Z27	Kafue	Yes	No	Yes
Z38	Kafue	Yes	No	Yes
Z01	Luangwa Valley	No		No
Z04	Luangwa Valley	No		No
Z07	Luangwa Valley	No		No
Z09	Luangwa Valley	No		No
Z108	Luangwa Valley	No		No
Z109	Luangwa Valley	No		No
Z111	Luangwa Valley	No		No
Z19	Luangwa Valley	No		No
Z31	Luangwa Valley	No		No
Z32	Luangwa Valley	No		No
Z35	Luangwa Valley	No		No
Z36	Luangwa Valley	No		No
Z39	Luangwa Valley	No		No
Z51	Luangwa Valley	No		No
Z59	Luangwa Valley	No		No
Z62	Luangwa Valley	No		No
Z65	Luangwa Valley	No		No
Z66	Luangwa Valley	No		No
Z90	Luangwa Valley	No		No
Z92	Luangwa Valley	No		No
Z96	Luangwa Valley	No		No
Z99	Luangwa Valley	No		No
Z110	Luangwa Valley	No		Yes
Z117	Luangwa Valley	No		Yes
Z25	Luangwa Valley	No		Yes
Z33	Luangwa Valley	No		Yes
Z68	Luangwa Valley	No		Yes
Z78	Luangwa Valley	No		Yes
Z85	Luangwa Valley	No		Yes
Z06	Luangwa Valley	Yes	Yes	No
Z103	Luangwa Valley	Yes	No	No
Z107	Luangwa Valley	Yes	No	No
Z11	Luangwa Valley	Yes	Yes	No
Z112	Luangwa Valley	Yes	Yes	No
Z16	Luangwa Valley	Yes	No	No
Z18	Luangwa Valley	Yes	Yes	No
Z29	Luangwa Valley	Yes	No	No
Z30	Luangwa Valley	Yes	No	No
Z42	Luangwa Valley	Yes	Yes	No
Z46	Luangwa Valley	Yes	No	No
Z64	Luangwa Valley	Yes	No	No
Z71	Luangwa Valley	Yes	Yes	No
Z72	Luangwa Valley	Yes	Yes	No
Z74	Luangwa Valley	Yes	Yes	No
Z84	Luangwa Valley	Yes	Yes	No
Z91	Luangwa Valley	Yes	Yes	No
Z93	Luangwa Valley	Yes	No	No
Z94	Luangwa Valley	Yes	No	No
Z102	Luangwa Valley	Yes	No	Yes
Z105	Luangwa Valley	Yes	Yes	Yes
Z118	Luangwa Valley	Yes	No	Yes
Z26	Luangwa Valley	Yes	No	Yes
Z47	Luangwa Valley	Yes	No	Yes
Z49	Luangwa Valley	Yes	No	Yes
Z52	Luangwa Valley	Yes	Yes	Yes
Z61	Luangwa Valley	Yes	No	Yes
Z67	Luangwa Valley	Yes	Yes	Yes
Z70	Luangwa Valley	Yes	Yes	Yes
Z81	Luangwa Valley	Yes	Yes	Yes
Z82	Luangwa Valley	Yes	No	Yes

## Sheet: P. pardus Injury
SAMPLE ID #	REGION	INJURY Y/N	CAUSE OF INJURY
Z200	Kafue	Yes	Prey
Z201	Kafue	Yes	Intraspecific
Z202	Kafue	Yes	Non-specific
Z203	Luangwa Valley	Yes	Intraspecific
Z204	Luangwa Valley	No	No
Z205	Kafue	Yes	Prey
Z206	Kafue	Yes	Non-specific
Z207	Luangwa Valley	Yes	Intraspecific
Z208	Luangwa Valley	Yes	Prey
Z209	Kafue	Yes	Intraspecific
Z210	Kafue	No	No
Z211	Kafue	Yes	Intraspecific
Z212	Luangwa Valley	Yes	Intraspecific
Z213	Luangwa Valley	Yes	Intraspecific
Z214	Kafue	Yes x2	Both prey & intraspecific
Z215	Luangwa Valley	Yes	Intraspecific
Z216	Kafue	Yes x2	Both prey & intraspecific
Z217	Kafue	Yes	Non-specific
Z218	Luangwa Valley	Yes	Intraspecific
Z219	Luangwa Valley	Yes	Prey
Z220	Luangwa Valley	No	No
Z221	Kafue	Yes	Intraspecific
Z222	Kafue	Yes x2	Both prey & intraspecific
Z223	Kafue	Yes	Non-specific
Z224	Kafue	No	No
Z225	Luangwa Valley	Yes	Intraspecific
Z226	Luangwa Valley	Yes	Intraspecific
Z227	Luangwa Valley	Yes	Prey
Z228	Kafue	No	No
Z229	Kafue	No	No
Z230	Kafue	Yes	Intraspecific
Z231	Luangwa Valley	No	No
Z232	Kafue	No	No
Z233	Kafue	No	No
Z234	Luangwa Valley	Yes	Non-specific
Z235	Kafue	No	No
Z236	Kafue	Yes	Intraspecific
Z237	Kafue	Yes	Non-specific
Z238	Luangwa Valley	No	No
Z239	Luangwa Valley	No	No
Z240	Kafue	No	No
Z241	Kafue	Yes	Intraspecific
Z242	Kafue	No	No
Z243	Luangwa Valley	Yes	Prey
Z244	Kafue	Yes	Intraspecific

## Sheet: C. crocuta Injury
SAMPLE ID #	REGION	INJURY Y/N	CAUSE OF INJURY
Z300	Kafue	Yes	Non-specific
Z301	Luangwa Valley	Yes	Non-specific
Z302	Luangwa Valley	Yes	Non-specific
Z303	Luangwa Valley	Yes	Bite across muzzle and frontal bones
Z304	Kafue	Maybe	Non-specific
Z305	Luangwa Valley	Maybe	Non-specific
Z306	Luangwa Valley	No
Z307	Kafue	Maybe	Non-specific
Z308	Kafue	No
Z309	Kafue	Maybe	Non-specific
Z310	Luangwa Valley	No
Z311	Kafue	No
Z312	Kafue	No
