# Supplementary material for: Naturally-occurring tooth wear, tooth fracture, and cranial injuries in large carnivores from Zambia
Source: PeerJ. 2021 Apr 20;9:e11313. doi: 10.7717/peerj.11313 (PMC8063872; doi:10.7717/peerj.11313)
Supplement: Supplemental Information 12 [file peerj-09-11313-s012.xlsx]

## Sheet: EleCarcassData LV
Data on elephant carcasses at a MIKE (Monitoring of Illegal Killing of Elephants) site in Luangwa Valley, Zambia (IUCN 2016)
UN Region	Subregion Name	Subregion ID	Country Name	Country Code	MIKE site ID	MIKE site Name	year	Total Number Of Carcasses	Number Of Illegal Carcasses
Africa	Southern Africa	FS	Zambia	zm	SLW	South Luangwa	2002	4	1
Africa	Southern Africa	FS	Zambia	zm	SLW	South Luangwa	2003	8	5
Africa	Southern Africa	FS	Zambia	zm	SLW	South Luangwa	2004	23	15
Africa	Southern Africa	FS	Zambia	zm	SLW	South Luangwa	2005	4	1
Africa	Southern Africa	FS	Zambia	zm	SLW	South Luangwa	2006	35	27
Africa	Southern Africa	FS	Zambia	zm	SLW	South Luangwa	2007	11	0
Africa	Southern Africa	FS	Zambia	zm	SLW	South Luangwa	2008	8	7
Africa	Southern Africa	FS	Zambia	zm	SLW	South Luangwa	2009	14	6
Africa	Southern Africa	FS	Zambia	zm	SLW	South Luangwa	2010	49	26
Africa	Southern Africa	FS	Zambia	zm	SLW	South Luangwa	2011	22	14
Africa	Southern Africa	FS	Zambia	zm	SLW	South Luangwa	2012	34	14
